# Supplementary material
Source: PubMed Central journal article supplement (PMC3781972)
Supplement: 059e4c420f2d2ecb7661ac8b6e43f61f_genetics.113.155861-3.pdf [file 059e4c420f2d2ecb7661ac8b6e43f61f_genetics.113.155861-3.pdf]

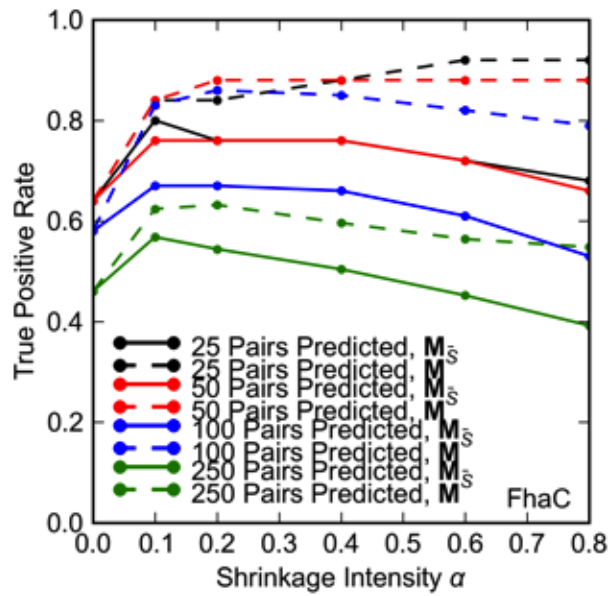

**Figure S4** Effect of shrinkage with model matrix  $M_S$  on DCA true positive rates. DCA was applied to FhaC as in Figures 1A,B with the same true positive definition. True positive rates are shown for various values of shrinkage intensity  $\alpha$  between 0 and 1.
