# Supplementary material
Source: PubMed Central journal article supplement (PMC3781972)
Supplement: a65c0d02a39ac27ac6e21b0e3797653e_genetics.113.155861-8.pdf [file a65c0d02a39ac27ac6e21b0e3797653e_genetics.113.155861-8.pdf]

## File S1

### Supporting Methods

#### Sequence Reweighting and Pseudocounts

In order to control for sequence bias in our MSA, sets of sequences that exceed a certain identity threshold are down-weighted as a group (Weigt *et al.* 2009; Marks *et al.* 2011; Morcos *et al.* 2011; Hopf *et al.* 2012). For every sequence  $m$  in an MSA, the number of “identical” sequences  $k_m$  is defined as

$$k_m \equiv \sum_{n=1}^M \vartheta \left( \sum_{i=1}^L \delta(A_i^m, B_i^n) - xL \right) \quad [\text{S1}]$$

where  $\vartheta$  is a step function equal to one if its argument is greater than or equal to zero and zero if the summation is negative,  $\delta$  is the Kronecker symbol used for counting, which is equal to one if  $A_i^m$  equals  $B_i^n$  and to zero otherwise, and  $x$  is the identity threshold, defined here as 0.7. When counting pair and single amino acid frequencies, the contribution of sequence  $m$  is down-weighted by  $1/k_m$ . The effective number of sequences in an alignment is therefore not  $M$  but  $M_{eff}$ , where

$$M_{eff} = \sum_{m=1}^M \frac{1}{k_m}. \quad [\text{S2}]$$

Pair and single amino acid frequencies are then calculated according to the relationships

$$f_i(A) \equiv \frac{1}{\lambda + M_{eff}} \left( \frac{\lambda}{q} + \sum_{m=1}^M \frac{1}{k_m} \delta(A_i^m, A) \right) \quad [\text{S3A}]$$

$$f_{ij}(A, B) \equiv \frac{1}{\lambda + M_{eff}} \left( \frac{\lambda}{q^2} + \sum_{m=1}^M \frac{1}{k_m} \delta(A_i^m, A) \delta(B_j^m, B) \right) \quad [\text{S3B}]$$

where  $\lambda$  is a pseudocount term used to ameliorate statistical noise due to underrepresented amino acids and pairs.

Here we set  $\lambda$  equal to  $M_{eff}$ . Note that the empirical correlation matrix is not invertible before pseudocounts are incorporated.

#### DCA

According to DCA, the coupling between columns  $i$  and  $j$  in an MSA is given by the direct information,  $DI_{ij}$ , score according to the relationship

$$DI_{ij} = \sum_{A, B=1}^q P_{ij}(A, B) \ln \left( \frac{P_{ij}(A, B)}{f_i(A) f_j(B)} \right) \quad [\text{S4}]$$

where  $P_{ij}(A,B)$  represents the inferred probability of finding amino acid pair  $(A,B)$  at positions  $i$  and  $j$  in the absence of interactions with other residues,  $f_i(A)$  and  $f_j(B)$  represent the single amino acid frequencies of  $A$  and  $B$  at positions  $i$  and  $j$ , and the summation is evaluated over all 441 pairs  $(A,B)$  possible for a  $q = 21$  state system, where the states represent the twenty amino acids and a gap.  $P_{ij}(A,B)$  is itself a function of the inferred coupling energy  $e_{ij}(A,B)$  and the inferred single residue energies  $\tilde{h}_i(A)$  and  $\tilde{h}_j(B)$  of amino acids  $A$  and  $B$  at positions  $i$  and  $j$  according to

$$P_{ij}(A,B) = \frac{1}{Z_{ij}} \left\{ e_{ij}(A,B) + \tilde{h}_i(A) + \tilde{h}_j(B) \right\} \quad [\text{S5}]$$

where  $Z_{ij}$  is the partition function. The coupling energies  $e_{ij}(A,B)$  are determined as described below by inverting an empirical correlation matrix,  $\mathbf{C}$ .

The empirical correlation matrix  $\mathbf{C}$  is determined from the MSA according to the relationships

$$C_{ij}(A,B)_{i \neq j} = f_{ij}(A,B) - f_i(A)f_j(B) \quad [\text{S6}]$$

$$C_{ij}(A,B)_{i=j, A=B} = f_i(A)(1 - f_i(A)) \quad [\text{S7}]$$

where  $f_i(A)$  is the frequency of amino acid  $A$  in MSA column  $i$ ,  $f_j(B)$  is the frequency of amino acid  $B$  in MSA column  $j$ , and  $f_{ij}(A,B)$  is the frequency of amino acid pair  $(A,B)$  in columns  $i$  and  $j$ . Calculation of correlations  $C_{ij}(A,B)$  where  $i = j$  but  $A \neq B$  is carried out according to Equation S6. Note that pair frequencies  $f_{ij}(A,B)$  are set to zero for these entries (despite having a finite value based on pseudocounts, as described below to reflect the fact that no protein sequence contains two different amino acids at a single site. The empirical correlation matrix has the dimensions  $20L$  by  $20L$  despite the fact that we employ a  $q = 21$  state model. This is because one amino acid, in our case the gap, is left out of the analysis in order to serve as a reference energy.

The global nature of the DCA algorithm derives from inversion of the empirical correlation matrix (or the composite matrix  $\mathbf{C}^*$  described below), which results in the coupling energy matrix,  $\mathbf{e}$ :

$$\mathbf{e} = -\mathbf{C}^{-1}. \quad [\text{S8}]$$

The fields  $\tilde{h}_i(A)$  and  $\tilde{h}_j(B)$  from Equation S5 are calculated numerically along with the partition function  $Z_{ij}$  so that the pair probabilities recapitulate the single amino acid frequencies,  $f_i(A)$  and  $f_j(B)$ , observed in the MSA:

$$\sum_{B=1}^q P_{ij}(A,B) \cong f_i(A) \quad [\text{S9A}]$$

$$\sum_{A=1}^q P_{ij}(A,B) \cong f_j(B). \quad [\text{S9B}]$$

Once field and coupling energies have been determined, direct information  $DI_{ij}$  scores can be evaluated using Equations S4 and S5. The result is a list of  $DI_{ij}$  scores representing the direct information between every pair of positions.

### Supporting Literature Cited

Hopf T. A., Colwell L. J., Sheridan R., Rost B., Sander C., Marks D. S., 2012 Three-dimensional structures of membrane proteins from genomic sequencing. *Cell* **149**: 1607–21.

Marks D. S., Colwell L. J., Sheridan R., Hopf T. A., Pagnani A., Zecchina R., Sander C., 2011 Protein 3D structure computed from evolutionary sequence variation. *PloS One* **6**: e28766.

Morcos F., Pagnani A., Lunt B., Bertolino A., Marks D. S., Sander C., Zecchina R., Onuchic J. N., Hwa T., Weigt M., 2011 Direct-coupling analysis of residue coevolution captures native contacts across many protein families. *Proc Natl Acad Sci* **108**: E1293–301.

Weigt M., White R. A., Szurmant H., Hoch J. A., Hwa T., 2009 Identification of direct residue contacts in protein-protein interaction by message passing. *Proc Natl Acad Sci* **106**: 67–72.
