# Supplementary material
Source: PubMed Central journal article supplement (PMC3781972)
Supplement: c2e8bdcfdfb500868a09788263389dc4_genetics.113.155861-4.pdf [file c2e8bdcfdfb500868a09788263389dc4_genetics.113.155861-4.pdf]

**Table S2 Primers**

| <b>BamA mutation</b> | <b>Primer pairs</b>                                                                  |
|----------------------|--------------------------------------------------------------------------------------|
| <b>F395V</b>         | 5' GAATCGTCTGGGCTTCGTTGAAACTGTCGATAC 3'<br>5' GTATCGACAGTTTCAACGAAGCCCAGACGATTC 3'   |
| <b>T423I</b>         | 5' GTAAAAGAGCGCAACATCGGTAGCTTCAACTTTG 3'<br>5' CAAAGTTGAAGCTACCGATGTTGCGCTCTTTTAC 3' |
| <b>E607A</b>         | 5' CTGGATCGGATAACGCATACTACAAAGTGAC 3'<br>5' GTCACTTTGTAGTATGCGTTATCCGATCCAG 3'       |
| <b>G631V</b>         | 5' CAAATGGGTTGTTCTGGTGCGTACCCGCTGGG 3'<br>5' CCCAGCGGGTACGCACCAGAACAACCCATTTG 3'     |
| <b>G631W</b>         | 5' CAAATGGGTTGTTCTGTGGCGTACCCGCTGGG 3'<br>5' CCCAGCGGGTACGCCACAGAACAACCCATTTG 3'     |
| <b>R661G</b>         | 5' TTCCAGCACCGTGGGCGGCTTCCAGTCCAATA 3'<br>5' TATTGGACTGGAAGCCGCCACGGTGCTGGAA 3'      |
| <b>F718L</b>         | 5' CAGCCTCGAGTTAATCACCCCGACG 3'<br>5' CGTCGGGGTGATTA ACTCGAGGCTG 3'                  |
| <b>D740G</b>         | 5' CTCCTTCTTCTGGGGTATGGGTACCGTTTG 3'<br>5' CCAAACGGTACCCATACCCAGAAGAAGGAAGTAC 3'     |
