# Supplementary material
Source: PubMed Central journal article supplement (PMC3781972)
Supplement: dc83c0dd086b9dc4b72141da10d62649_genetics.113.155861-5.pdf [file dc83c0dd086b9dc4b72141da10d62649_genetics.113.155861-5.pdf]

**Table S1 Strains and plasmids**

| Strain/plasmid                     | Genotype and relevant features                                                                          | Reference             |
|------------------------------------|---------------------------------------------------------------------------------------------------------|-----------------------|
| <b><i>E. coli</i> K-12 strains</b> |                                                                                                         |                       |
| MC4100                             | F- <i>araD139 (argF-lac)U169 rpsL150 relA1 flb5301 deoC1 ptsF25 thi</i>                                 | Boyd et al 2000       |
| JCM158                             | MC4100 <i>ara</i> <sup>r/-</sup>                                                                        | Malinverni et al 2006 |
| JCM320                             | JCM158 $\Delta$ <i>bamA</i> $\Delta$ ( <i>latt-lom</i> ):: <i>bla</i> P <sub>BAD</sub> <i>bamA araC</i> | Wu et al 2005         |
| DPR437                             | JCM320 pDPR1                                                                                            | Ricci et al 2012      |
| DPR660                             | JCM320 pBamA <sup>R661G</sup>                                                                           | This study            |
| DPR1345                            | JCM320 pBamA <sup>D740G</sup>                                                                           | This study            |
| DPR1346                            | JCM320 pBamA <sup>D740G+R661G</sup>                                                                     | This study            |
| DPR1374                            | JCM320 pBamA <sup>D740G+F395V</sup>                                                                     | This study            |
| DPR1309                            | JCM320 pBamA <sup>D740G+T423I</sup>                                                                     | This study            |
| DPR1310                            | JCM320 pBamA <sup>D740G+E607A</sup>                                                                     | This study            |
| DPR1311                            | JCM320 pBamA <sup>D740G+G631V</sup>                                                                     | This study            |
| DPR1500                            | JCM320 pBamA <sup>D740G+G631W</sup>                                                                     | This study            |
| DPR1313                            | JCM320 pBamA <sup>D740G+F717L</sup>                                                                     | This study            |
| DPR1317                            | JCM320 pBamA <sup>R661G+F395V</sup>                                                                     | This study            |
| DPR1318                            | JCM320 pBamA <sup>R661G+T423I</sup>                                                                     | This study            |
| DPR1319                            | JCM320 pBamA <sup>R661G+E607A</sup>                                                                     | This study            |
| DPR1320                            | JCM320 pBamA <sup>R661G+G631V</sup>                                                                     | This study            |
| DPR1501                            | JCM320 pBamA <sup>R661G+G631W</sup>                                                                     | This study            |
| DPR1321                            | JCM320 pBamA <sup>R661G+F717L</sup>                                                                     | This study            |
| <b>Plasmids</b>                    |                                                                                                         |                       |
| pZS21                              | Expression vector; $\lambda$ P <sub>L</sub> -driven expression, Kan <sup>r</sup>                        | Lutz & Bujard, 1997   |
| pBamA (pDPR1)                      | pZS21:: <i>bamA</i> <sup>WT</sup>                                                                       | Kim et al 2007        |
| pBamA <sup>R661G</sup>             | pZS21:: <i>bamA</i> <sup>R661G</sup>                                                                    | This study            |

|                              |                                |            |
|------------------------------|--------------------------------|------------|
| pBamA <sup>D740G</sup>       | pZS21:: <i>bamAD740G</i>       | This study |
| pBamA <sup>D740G+R661G</sup> | pZS21:: <i>bamAD740G+R661G</i> | This study |
| pBamA <sup>D740G+F395V</sup> | pZS21:: <i>bamAD740G+F395V</i> | This study |
| pBamA <sup>D740G+T423I</sup> | pZS21:: <i>bamAD740G+T423I</i> | This study |
| pBamA <sup>D740G+E607A</sup> | pZS21:: <i>bamAD740G+E607A</i> | This study |
| pBamA <sup>D740G+G631W</sup> | pZS21:: <i>bamAD740G+G631W</i> | This study |
| pBamA <sup>D740G+G631V</sup> | pZS21:: <i>bamAD740G+G631V</i> | This study |
| pBamA <sup>D740G+F717L</sup> | pZS21:: <i>bamAD740G+F717L</i> | This study |
| pBamA <sup>R661G+F395V</sup> | pZS21:: <i>bamAR661G+F395V</i> | This study |
| pBamA <sup>R661G+T423I</sup> | pZS21:: <i>bamAR661G+T423I</i> | This study |
| pBamA <sup>R661G+E607A</sup> | pZS21:: <i>bamAR661G+E607A</i> | This study |
| pBamA <sup>R661G+G631W</sup> | pZS21:: <i>bamAR661G+G631W</i> | This study |
| pBamA <sup>R661G+G631V</sup> | pZS21:: <i>bamAR661G+G631V</i> | This study |
| pBamA <sup>R661G+F717L</sup> | pZS21:: <i>bamAR661G+F717L</i> | This study |

---
